# Supplementary material for: Work-related musculoskeletal disorders, fatigue and stress among gas station workers in China: a cross-sectional study
Source: PubMed Central journal article supplement — BMJ Open. 2024 Jul 5;14(7):e081853. doi: 10.1136/bmjopen-2023-081853 (PMC11227785; doi:10.1136/bmjopen-2023-081853), 2024-07-05
Supplement: bmjopen-2023-081853supp001.pdf [file bmjopen-2023-081853supp001.pdf]

**Supplementary Table 1.** WMSDs in gas station workers

|                                                       | Body Region      |                 |                |                 |                 |                 |                 |                 |                 |
|-------------------------------------------------------|------------------|-----------------|----------------|-----------------|-----------------|-----------------|-----------------|-----------------|-----------------|
|                                                       | Neck             | Shoulders       | Elbows         | Wrists/hands    | Hips            | Knees           | Lower back      | Upper back      | Ankles/feet     |
| <b>12-month period prevalence</b><br>(n=2169, 73.23%) | 1252 (42.27%)    | 1063 (35.89%)   | 249<br>(8.40%) | 654 (22.08%)    | 339<br>(11.44%) | 655<br>(22.11%) | 543 (18.33%)    | 515 (17.39%)    | 1028 (34.71%)   |
| <b>Gender</b>                                         |                  |                 |                |                 |                 |                 |                 |                 |                 |
| Female                                                | 730<br>(24.65%)  | 643<br>(21.71%) | 141<br>(4.76%) | 399<br>(13.47%) | 180<br>(6.08%)  | 339<br>(11.44%) | 291<br>(9.82%)  | 290<br>(9.79%)  | 527<br>(17.79%) |
| Male                                                  | 500<br>(16.9%)   | 402 (13.57%)    | 106<br>(3.58%) | 249<br>(8.41%)  | 155<br>(5.23%)  | 309<br>(10.43%) | 241<br>(8.14%)  | 219<br>(7.39%)  | 490<br>(16.54%) |
| <b>Age</b>                                            |                  |                 |                |                 |                 |                 |                 |                 |                 |
| ≤ 30                                                  | 231<br>(7.80%)   | 199<br>(6.72%)  | 55<br>(1.86%)  | 143<br>(4.83%)  | 75<br>(2.53%)   | 121<br>(4.09%)  | 116<br>(3.92%)  | 123<br>(4.15%)  | 227<br>(7.66%)  |
| 31–40                                                 | 640<br>(21.61%)  | 532<br>(17.96%) | 111<br>(3.75%) | 323<br>(10.90%) | 168<br>(5.67%)  | 302<br>(10.20%) | 270<br>(9.12%)  | 248<br>(8.37%)  | 499<br>(16.85%) |
| 41–50                                                 | 312<br>(10.53%)  | 269<br>(9.08%)  | 70<br>(2.36%)  | 157<br>(5.30%)  | 79<br>(2.67%)   | 184<br>(6.21%)  | 127<br>(4.29%)  | 119<br>(4.02%)  | 251<br>(8.47%)  |
| ≥ 51                                                  | 25<br>(0.84%)    | 19<br>(0.64%)   | 6<br>(0.20%)   | 11<br>(0.37%)   | 6<br>(0.20%)    | 22<br>(0.74%)   | 9<br>(0.30%)    | 7<br>(0.24%)    | 13<br>(0.44%)   |
| <b>Job role</b>                                       |                  |                 |                |                 |                 |                 |                 |                 |                 |
| Frontline staff                                       | 1002<br>(33.83%) | 855<br>(28.87%) | 220<br>(7.43%) | 583<br>(19.68%) | 268<br>(9.05%)  | 583<br>(19.68%) | 445<br>(15.02%) | 403<br>(13.61%) | 978<br>(33.02%) |
| Non-frontline staff                                   | 248<br>(8.37%)   | 206<br>(6.95%)  | 28<br>(0.95%)  | 70<br>(2.36%)   | 70<br>(2.36%)   | 70<br>(2.36%)   | 96<br>(3.24%)   | 110<br>(2.71%)  | 46<br>(1.55%)   |
