# Supplementary material for: Work-related musculoskeletal disorders, fatigue and stress among gas station workers in China: a cross-sectional study
Source: PubMed Central journal article supplement — BMJ Open. 2024 Jul 5;14(7):e081853. doi: 10.1136/bmjopen-2023-081853 (PMC11227785; doi:10.1136/bmjopen-2023-081853), 2024-07-05
Supplement: bmjopen-2023-081853supp002.pdf [file bmjopen-2023-081853supp002.pdf]

**Supplementary Table 2.** Correlation among stress, fatigue, WMSDs, work and personal characteristics

| Variables                   | (1)     | (2)     | (3)     | (4)     | (5)     | (6)     | (7)    | (8)    | (9) |
|-----------------------------|---------|---------|---------|---------|---------|---------|--------|--------|-----|
| (1) Stress                  | 1       |         |         |         |         |         |        |        |     |
| (2) Fatigue                 | 0.61**  | 1       |         |         |         |         |        |        |     |
| (3) WMSDs                   | 0.40**  | 0.47**  | 1       |         |         |         |        |        |     |
| (4) Lifestyle               | -0.20** | -0.25** | -0.30** | 1       |         |         |        |        |     |
| (5) Personality             | -0.18** | -0.25** | -0.24** | 0.63**  | 1       |         |        |        |     |
| (6) Workload                | 0.71**  | 0.59**  | 0.41**  | -0.21** | -0.20** | 1       |        |        |     |
| (7) Job control and support | -0.07** | -0.12** | -0.12** | 0.30**  | 0.38**  | -0.08** | 1      |        |     |
| (8) Noise                   | 0.38**  | 0.40**  | 0.35**  | -0.15** | -0.14** | 0.43**  | -0.03  | 1      |     |
| (9) Fumes                   | 0.23**  | 0.23**  | 0.11**  | 0.00    | 0.01    | 0.28**  | 0.06** | 0.46** | 1   |

\*\* $p < 0.001$
